# Supplementary material for: Global mRNA and miRNA Analysis Reveal Key Processes in the Initial Response to Infection with WSSV in the Pacific Whiteleg Shrimp
Source: MDPI journal article supplement (doi:10.3390/v13061140), 2021-06-13
Supplement: s1 [file s1]

## Supplementary Material

**Figure S1: RNA-seq analysis workflow.** Detailed bioinformatics workflow (black boxes) for analysis of RNA-seq dataset. For each step, specific tools, scripts and parameters utilised are depicted within orange boxes and a summary of the resulting outputs are displayed in blue boxes.

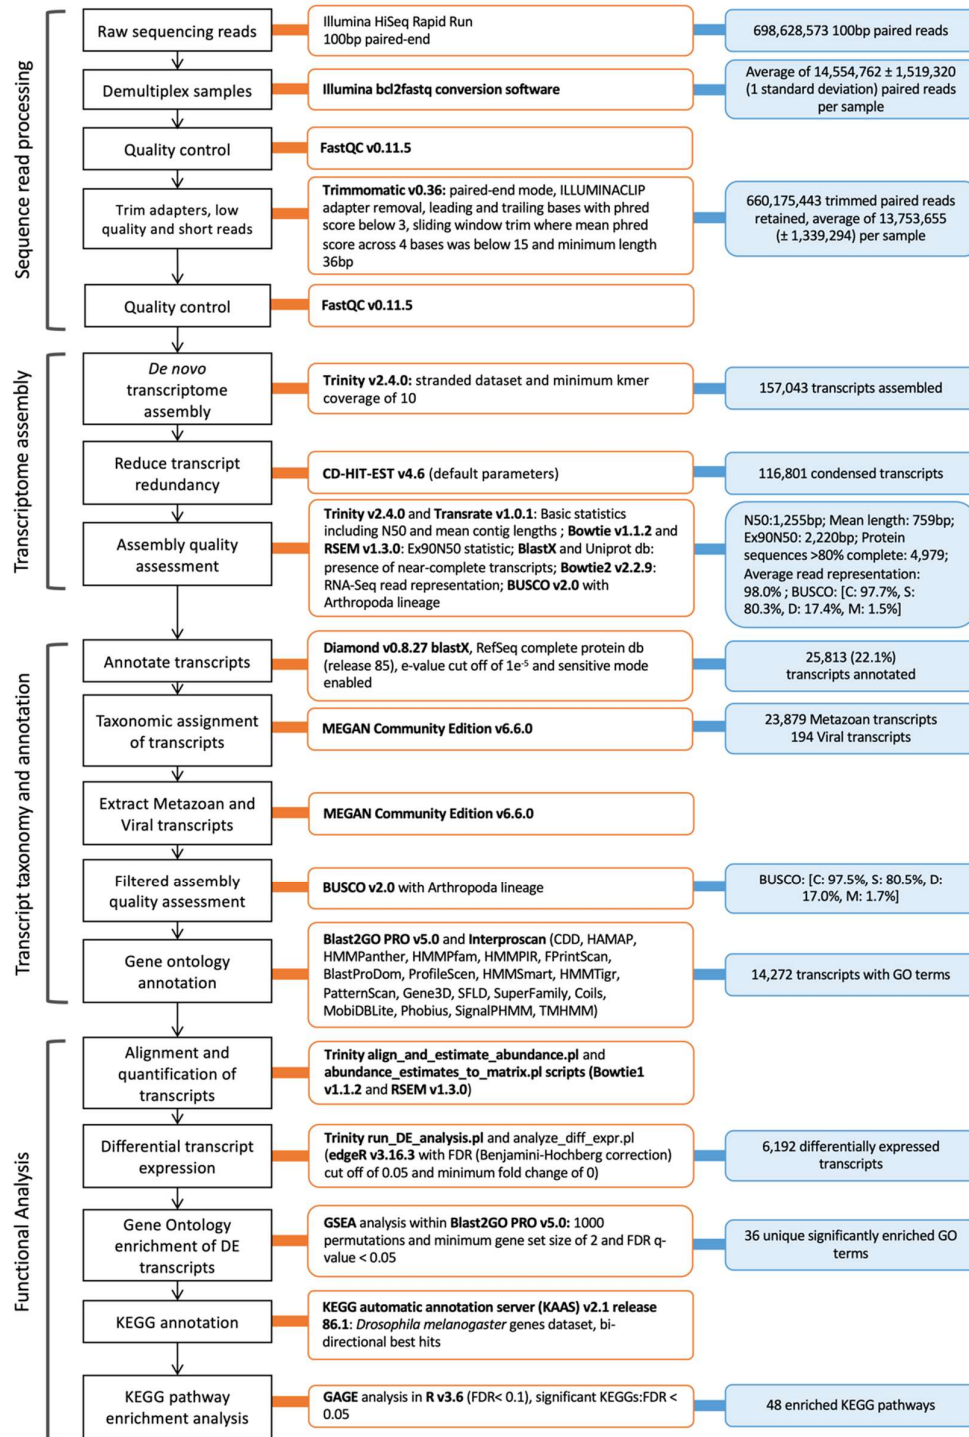

**Figure S2: miRNA-seq analysis workflow.** Detailed bioinformatics workflow (black boxes) for analysis of microRNA-seq dataset. For each step, specific tools, scripts and parameters utilised are depicted within orange boxes and a summary of the resulting outputs are displayed in blue boxes.

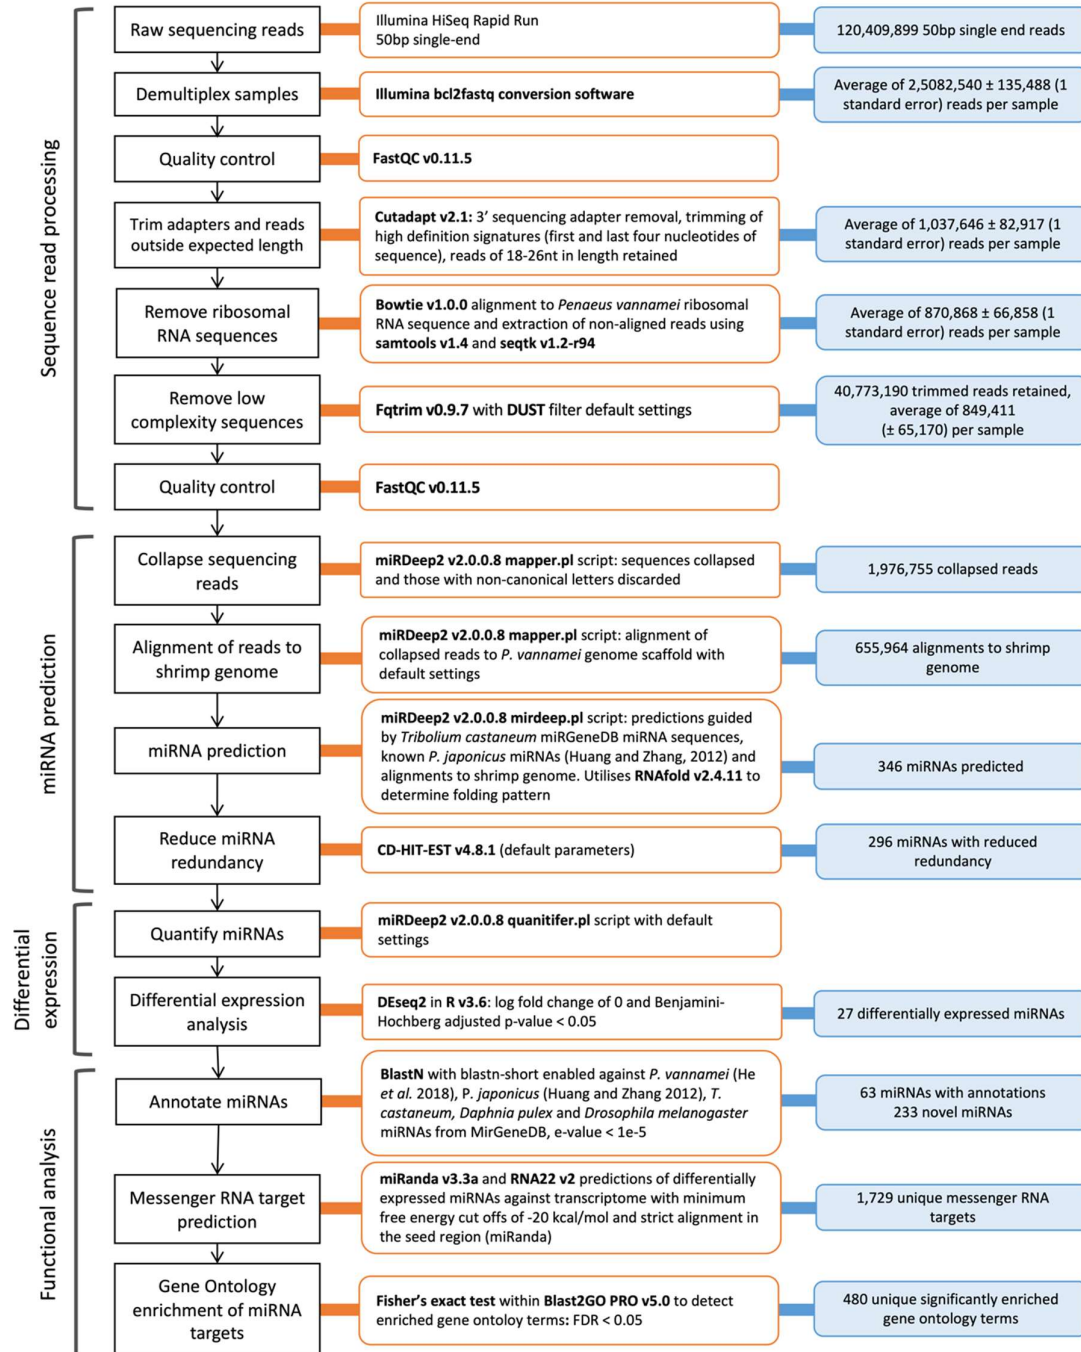

**Figure S3: Significantly over and underrepresented oxidative phosphorylation KEGG pathway.**

Oxidative phosphorylation KEGG pathway (*Drosophila melanogaster*; ID: 00190) populated with log fold change transcription data, using the Pathview package in R, from shrimp at (a) 3h, (b) 6h, (c) 9h, (d) 12h, (e) 24h and (f) 36h post WSSV injection. Upregulated transcripts are shown in red and downregulated transcripts are shown in blue. Transcripts present within the *Drosophila melanogaster* pathway, that were unchanged between WSSV-injected and time-matched control shrimp at each time point are shaded grey and transcripts absent from the dataset are indicated by white boxes. Transcripts that were significantly differentially expressed are outlined with a thick black box. The time course of expression data indicates that at 9 hpi elements of all oxidative phosphorylation complexes are downregulated resulting in increased oxidative stress. At 12 hpi, there is some evidence of recovery as several elements of these complexes are upregulated. Whilst this upregulation is observed in a larger number of complex subunits from 24 hpi, there is evidence of electron transport chain uncoupling as elements of complex I-IV are upregulated and complex V are downregulated.





(c)

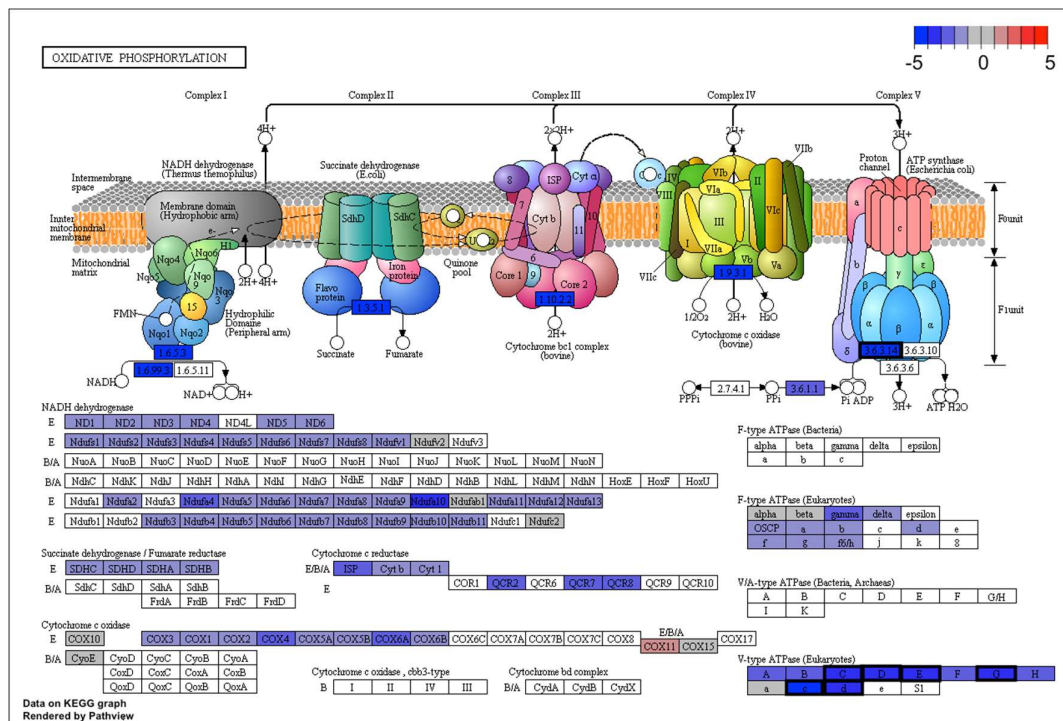

(d)

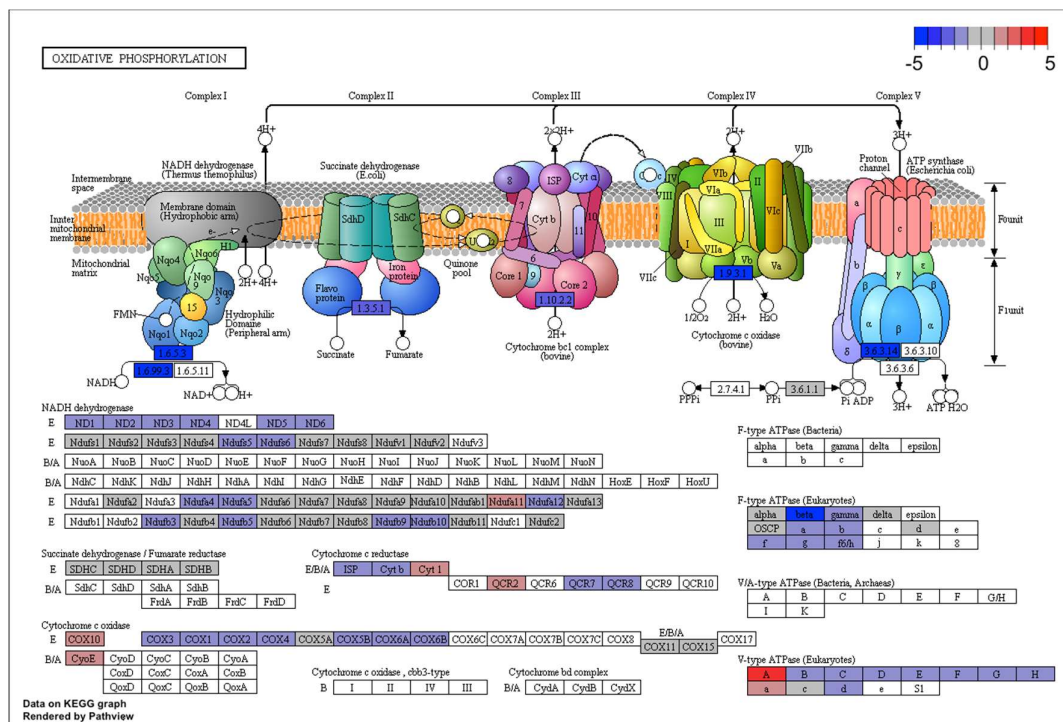



**Table S1. Significantly differentially expressed miRNAs in response to WSSV injection over time.**

Differentially expressed miRNAs (adjusted p-value < 0.05), separated by experimental time point, in response to WSSV injection. Upregulated miRNAs are highlighted in green and downregulated miRNAs are highlighted in red.

| Time post injection | miRNA                   | annotation       | sequence                 | log2FC | p-adj    |
|---------------------|-------------------------|------------------|--------------------------|--------|----------|
| 3h                  | LVANscaffold_2661_16907 | Pva-pmiR-120     | TTCTCCAGTAGCCTGTTAG      | 22.654 | 3.45E-07 |
| 3h                  | LVANscaffold_1752_10269 | Pva-miR-133      | TTGGTCCCCTTCAACCAGCTGT   | 6.415  | 2.17E-03 |
| 6h                  | LVANscaffold_1752_10269 | Pva-miR-133      | TTGGTCCCCTTCAACCAGCTGT   | 7.997  | 1.76E-05 |
| 6h                  | LVANscaffold_1495_8360  | Pva-pmiR-31      | ATTATCATTCTTTGGCGTCCGG   | 1.740  | 1.71E-04 |
| 6h                  | LVANscaffold_3588_23974 | Pva-miR-1        | TGGAATGTAAAGAAGTATGGAG   | 2.699  | 1.43E-03 |
| 6h                  | LVANscaffold_2877_18478 | Pva-miR-750      | CCAGATCTAACTCTCCAGCTCA   | -1.999 | 9.83E-03 |
| 6h                  | LVANscaffold_1646_9393  | Pva-miR-novel_11 | TCCTGAGACCTTTCTTGTA      | 0.977  | 2.43E-02 |
| 6h                  | LVANscaffold_2658_16858 | Pva-pmiR-118     | CCATTACCTTCTCCCTCTT      | 2.195  | 3.66E-02 |
| 12h                 | LVANscaffold_3085_20010 | Pva-pmiR-141     | GCAGTGCATCACCTCCCTAGGC   | 2.678  | 8.79E-04 |
| 12h                 | LVANscaffold_1304_7171  | Pva-pmiR-18      | CTTGGGAGGTGCTGCACTGCTA   | 1.199  | 4.83E-02 |
| 24h                 | LVANscaffold_2088_12726 | Pva-pmiR-81      | TGACTAGATACGACACTCATCCA  | 6.888  | 1.65E-12 |
| 24h                 | LVANscaffold_2088_12722 | Pva-pmiR-80      | TATCACAGTTGAAGTTACCTAGA  | 6.148  | 2.23E-07 |
| 24h                 | LVANscaffold_2088_12713 | Pva-pmiR-78      | TTAGGAACTGACACTGTGGTAGG  | 7.851  | 8.07E-04 |
| 24h                 | LVANscaffold_2088_12728 | Pva-mir-36       | TCACCGGGTAGGATTCATCCAA   | 7.511  | 2.03E-03 |
| 24h                 | LVANscaffold_3170_20854 | Pva-miR-190      | AGATATGTTTGATATCTTGTTG   | 1.201  | 2.03E-03 |
| 24h                 | LVANscaffold_2789_17819 | Pva-miR-193b     | CAATGCCCTTGGAATCCCAA     | 5.311  | 5.69E-03 |
| 24h                 | LVANscaffold_2088_12712 | Pva-pmiR-77      | TGACTAGATCCAACACTCATCCAG | 6.241  | 1.16E-02 |
| 24h                 | LVANscaffold_4587_26117 | Pva-miR-79a      | ATAAAGCTAGATTACCAAAGTC   | -0.834 | 1.16E-02 |
| 24h                 | LVANscaffold_1304_7171  | Pva-pmiR-18      | CTTGGGAGGTGCTGCACTGCTA   | 1.144  | 1.48E-02 |
| 24h                 | LVANscaffold_4587_26123 | Pva-miR-79b      | ATAAAGCTAGATTACCAAAGCA   | -0.866 | 2.26E-02 |
| 24h                 | LVANscaffold_1654_9453  | Pva-pmiR-44      | AGGCAAGACTCCGCGTAGCTG    | 1.800  | 4.27E-02 |
| 24h                 | LVANscaffold_2888_18595 | Pva-pmiR-133     | CTTACGACCATCTAGCACGGCGC  | 1.091  | 5.00E-02 |
| 24h                 | LVANscaffold_2127_13165 | Pva-miR-279      | TGACTAGATCCCACTCATCCA    | -0.327 | 9.76E-02 |
| 36h                 | LVANscaffold_2088_12726 | Pva-pmiR-81      | TGACTAGATACGACACTCATCCA  | 6.223  | 2.02E-08 |
| 36h                 | LVANscaffold_3170_20854 | Pva-miR-190      | AGATATGTTTGATATCTTGTTG   | 1.728  | 3.44E-07 |
| 36h                 | LVANscaffold_2088_12722 | Pva-pmiR-80      | TATCACAGTTGAAGTTACCTAGA  | 6.538  | 3.07E-06 |
| 36h                 | LVANscaffold_1304_7171  | Pva-pmiR-18      | CTTGGGAGGTGCTGCACTGCTA   | 1.600  | 8.30E-05 |
| 36h                 | LVANscaffold_2661_16907 | Pva-pmiR-120     | TTCTCCAGTAGCCTGTTAG      | 16.669 | 5.27E-04 |
| 36h                 | LVANscaffold_4587_26117 | Pva-miR-79a      | ATAAAGCTAGATTACCAAAGTC   | -0.991 | 8.33E-04 |
| 36h                 | LVANscaffold_1262_6936  | Pva-pmiR-15      | CTCCCTTCGTTGTTCTGTTG     | 4.860  | 1.53E-03 |
| 36h                 | LVANscaffold_2088_12713 | Pva-pmiR-78      | TTAGGAACTGACACTGTGGTAGG  | 7.164  | 1.53E-03 |
| 36h                 | LVANscaffold_4587_26123 | Pva-miR-79b      | ATAAAGCTAGATTACCAAAGCA   | -0.988 | 3.70E-03 |
| 36h                 | LVANscaffold_2088_12712 | Pva-pmiR-77      | TGACTAGATCCAACACTCATCCAG | 6.042  | 1.22E-02 |
| 36h                 | LVANscaffold_1567_8839  | Pva-pmiR-36      | CCAACGATAGAAAGGTGTCTC    | 0.901  | 1.48E-02 |
| 36h                 | LVANscaffold_2088_12728 | Pva-mir-36       | TCACCGGGTAGGATTCATCCAA   | 6.089  | 1.54E-02 |
| 36h                 | LVANscaffold_3018_19452 | Pva-pmiR-138     | CCCCATCGTGATAAGCCCCTAT   | 2.367  | 3.72E-02 |

| Time<br>post<br>injection | miRNA                   | annotation       | sequence               | log2FC | p-adj    |
|---------------------------|-------------------------|------------------|------------------------|--------|----------|
| 36h                       | LVANscaffold_505_1551   | Pva-miR-novel_12 | ATTACGACCTTCTAGCACGG   | 1.188  | 3.88E-02 |
| 36h                       | LVANscaffold_2657_16836 | Pva-pmiR-116     | TAGCACCAGTGGATTGAGCATG | -0.508 | 4.37E-02 |
| 36h                       | LVANscaffold_268_845    | Pva-pmiR-121     | TATTATGCTAAGATTCGTGTAT | 1.806  | 4.87E-02 |



**Table S2. GO term enrichment among differentially expressed transcripts.** Table of enriched gene ontology terms determined by gene set enrichment analysis (GSEA) within Blast2GO PRO v5.0 at 3, 6, 9, 12, 24 and 36 hours post WSSV determined using lists of differentially expressed transcripts for each time point post infection. GO terms that were not significantly enriched (FDR q value > 0.05) are highlighted in grey.

| Time post injection | GO ID      | GO Name                                     | GO Category | Size | Enrichment score | FDR q value |
|---------------------|------------|---------------------------------------------|-------------|------|------------------|-------------|
| 3h                  | GO:0005856 | cytoskeleton                                | CC          | 47   | -0.345           | 2.41E-03    |
| 3h                  | GO:0015629 | actin cytoskeleton                          | CC          | 39   | -0.354           | 3.21E-03    |
| 3h                  | GO:0044430 | cytoskeletal part                           | CC          | 39   | -0.354           | 5.11E-03    |
| 3h                  | GO:0030016 | myofibril                                   | CC          | 7    | -0.683           | 5.13E-03    |
| 3h                  | GO:0005861 | troponin complex                            | CC          | 7    | -0.683           | 5.48E-03    |
| 3h                  | GO:0044449 | contractile fiber part                      | CC          | 7    | -0.683           | 5.52E-03    |
| 3h                  | GO:0036379 | myofilament                                 | CC          | 7    | -0.683           | 5.67E-03    |
| 3h                  | GO:0043292 | contractile fiber                           | CC          | 7    | -0.683           | 5.75E-03    |
| 3h                  | GO:0099080 | supramolecular complex                      | CC          | 7    | -0.683           | 5.96E-03    |
| 3h                  | GO:0030017 | sarcomere                                   | CC          | 7    | -0.683           | 6.48E-03    |
| 3h                  | GO:0099512 | supramolecular fiber                        | CC          | 7    | -0.683           | 6.63E-03    |
| 3h                  | GO:0005865 | striated muscle thin filament               | CC          | 7    | -0.683           | 6.71E-03    |
| 3h                  | GO:0007010 | cytoskeleton organization                   | BP          | 5    | -0.766           | 7.21E-03    |
| 3h                  | GO:0099081 | supramolecular polymer                      | CC          | 7    | -0.683           | 7.28E-03    |
| 3h                  | GO:0016459 | myosin complex                              | CC          | 32   | -0.304           | 3.97E-02    |
| 3h                  | GO:0003774 | motor activity                              | MF          | 36   | -0.277           | 7.02E-02    |
| 6h                  | GO:0036338 | viral membrane                              | CC          | 20   | -0.556           | 0.00E+00    |
| 6h                  | GO:0019031 | viral envelope                              | CC          | 20   | -0.556           | 0.00E+00    |
| 6h                  | GO:0019012 | virion                                      | CC          | 20   | -0.556           | 0.00E+00    |
| 6h                  | GO:0044423 | virion part                                 | CC          | 20   | -0.556           | 0.00E+00    |
| 6h                  | GO:0015629 | actin cytoskeleton                          | CC          | 58   | -0.300           | 8.60E-04    |
| 6h                  | GO:0003774 | motor activity                              | MF          | 57   | -0.301           | 9.50E-04    |
| 6h                  | GO:0016459 | myosin complex                              | CC          | 49   | -0.313           | 1.11E-03    |
| 6h                  | GO:0044430 | cytoskeletal part                           | CC          | 60   | -0.277           | 1.15E-03    |
| 6h                  | GO:0005856 | cytoskeleton                                | CC          | 75   | -0.235           | 3.91E-03    |
| 6h                  | GO:0009262 | deoxyribonucleotide metabolic process       | BP          | 3    | -0.969           | 9.40E-03    |
| 6h                  | GO:0009263 | deoxyribonucleotide biosynthetic process    | BP          | 3    | -0.969           | 9.93E-03    |
| 6h                  | GO:0016874 | ligase activity                             | MF          | 3    | -0.922           | 1.41E-02    |
| 6h                  | GO:0006220 | pyrimidine nucleotide metabolic process     | BP          | 2    | -0.973           | 7.29E-02    |
| 6h                  | GO:0009265 | 2'-deoxyribonucleotide biosynthetic process | BP          | 2    | -0.973           | 7.35E-02    |

| Time post injection | GO ID      | GO Name                                                       | GO Category | Size | Enrichment score | FDR q value |
|---------------------|------------|---------------------------------------------------------------|-------------|------|------------------|-------------|
| 6h                  | GO:0006221 | pyrimidine nucleotide biosynthetic process                    | BP          | 2    | -0.973           | 7.50E-02    |
| 6h                  | GO:0009219 | pyrimidine deoxyribonucleotide metabolic process              | BP          | 2    | -0.973           | 7.61E-02    |
| 6h                  | GO:0072527 | pyrimidine-containing compound metabolic process              | BP          | 2    | -0.973           | 7.78E-02    |
| 6h                  | GO:0072528 | pyrimidine-containing compound biosynthetic process           | BP          | 2    | -0.973           | 7.94E-02    |
| 6h                  | GO:0046385 | deoxyribose phosphate biosynthetic process                    | BP          | 2    | -0.973           | 7.95E-02    |
| 6h                  | GO:0009221 | pyrimidine deoxyribonucleotide biosynthetic process           | BP          | 2    | -0.973           | 8.05E-02    |
| 6h                  | GO:0019692 | deoxyribose phosphate metabolic process                       | BP          | 2    | -0.973           | 8.10E-02    |
| 6h                  | GO:0044877 | protein-containing complex binding                            | MF          | 10   | -0.475           | 8.39E-02    |
| 6h                  | GO:0009394 | 2'-deoxyribonucleotide metabolic process                      | BP          | 2    | -0.973           | 8.54E-02    |
| 6h                  | GO:0051015 | actin filament binding                                        | MF          | 10   | -0.475           | 8.67E-02    |
| 9h                  | GO:0019031 | viral envelope                                                | CC          | 27   | -0.714           | 0.00E+00    |
| 9h                  | GO:0036338 | viral membrane                                                | CC          | 27   | -0.714           | 0.00E+00    |
| 9h                  | GO:0044423 | virion part                                                   | CC          | 28   | -0.681           | 0.00E+00    |
| 9h                  | GO:0019012 | virion                                                        | CC          | 28   | -0.681           | 0.00E+00    |
| 9h                  | GO:0043492 | ATPase activity, coupled to movement of substances            | MF          | 4    | 0.851            | 3.56E-02    |
| 9h                  | GO:0042623 | ATPase activity, coupled                                      | MF          | 4    | 0.851            | 4.00E-02    |
| 9h                  | GO:1901137 | carbohydrate derivative biosynthetic process                  | BP          | 5    | -0.731           | 4.31E-02    |
| 9h                  | GO:0015405 | P-P-bond-hydrolysis-driven transmembrane transporter activity | MF          | 4    | 0.851            | 4.75E-02    |
| 9h                  | GO:0065009 | regulation of molecular function                              | BP          | 3    | 0.877            | 4.79E-02    |
| 9h                  | GO:0090662 | ATP hydrolysis coupled transmembrane transport                | BP          | 10   | 0.512            | 4.80E-02    |
| 9h                  | GO:0015630 | microtubule cytoskeleton                                      | CC          | 4    | 0.772            | 4.81E-02    |
| 9h                  | GO:0015078 | proton transmembrane transporter activity                     | MF          | 10   | 0.512            | 4.91E-02    |
| 9h                  | GO:0098660 | inorganic ion transmembrane transport                         | BP          | 10   | 0.512            | 4.96E-02    |
| 9h                  | GO:0009263 | deoxyribonucleotide biosynthetic process                      | BP          | 3    | -0.921           | 5.10E-02    |
| 9h                  | GO:0009262 | deoxyribonucleotide metabolic process                         | BP          | 3    | -0.921           | 5.19E-02    |
| 9h                  | GO:0099132 | ATP hydrolysis coupled cation transmembrane transport         | BP          | 10   | 0.512            | 5.21E-02    |
| 9h                  | GO:0015988 | energy coupled proton transmembrane                           | BP          | 10   | 0.512            | 5.22E-02    |

| Time post injection | GO ID      | GO Name                                                        | GO Category | Size | Enrichment score | FDR q value |
|---------------------|------------|----------------------------------------------------------------|-------------|------|------------------|-------------|
|                     |            | transport, against electrochemical gradient                    |             |      |                  |             |
| 9h                  | GO:0030695 | GTPase regulator activity                                      | MF          | 5    | 0.678            | 5.29E-02    |
| 9h                  | GO:0098796 | membrane protein complex                                       | CC          | 10   | 0.512            | 5.32E-02    |
| 9h                  | GO:0098662 | inorganic cation transmembrane transport                       | BP          | 10   | 0.512            | 5.36E-02    |
| 9h                  | GO:0022853 | active ion transmembrane transporter activity                  | MF          | 3    | 0.850            | 5.43E-02    |
| 9h                  | GO:0016887 | ATPase activity                                                | MF          | 4    | 0.851            | 5.54E-02    |
| 9h                  | GO:0060589 | nucleoside-triphosphatase regulator activity                   | MF          | 5    | 0.678            | 5.57E-02    |
| 9h                  | GO:0006812 | cation transport                                               | BP          | 10   | 0.512            | 5.68E-02    |
| 9h                  | GO:0046961 | proton-transporting ATPase activity, rotational mechanism      | MF          | 3    | 0.850            | 5.68E-02    |
| 9h                  | GO:0060089 | molecular transducer activity                                  | MF          | 10   | 0.477            | 5.79E-02    |
| 9h                  | GO:0042625 | ATPase coupled ion transmembrane transporter activity          | MF          | 3    | 0.850            | 5.84E-02    |
| 9h                  | GO:0016757 | transferase activity, transferring glycosyl groups             | MF          | 4    | 0.734            | 5.85E-02    |
| 9h                  | GO:0019829 | cation-transporting ATPase activity                            | MF          | 3    | 0.850            | 6.03E-02    |
| 9h                  | GO:0098655 | cation transmembrane transport                                 | BP          | 10   | 0.512            | 6.06E-02    |
| 9h                  | GO:0004871 | signal transducer activity                                     | MF          | 10   | 0.477            | 6.11E-02    |
| 9h                  | GO:0036442 | proton-exporting ATPase activity                               | MF          | 3    | 0.850            | 6.19E-02    |
| 9h                  | GO:0008047 | enzyme activator activity                                      | MF          | 5    | 0.678            | 6.24E-02    |
| 9h                  | GO:0030234 | enzyme regulator activity                                      | MF          | 8    | 0.623            | 6.27E-02    |
| 9h                  | GO:0033176 | proton-transporting V-type ATPase complex                      | CC          | 9    | 0.511            | 6.34E-02    |
| 9h                  | GO:1901565 | organonitrogen compound catabolic process                      | BP          | 7    | 0.551            | 6.42E-02    |
| 9h                  | GO:0015672 | monovalent inorganic cation transport                          | BP          | 10   | 0.512            | 6.43E-02    |
| 9h                  | GO:0098772 | molecular function regulator                                   | MF          | 11   | 0.448            | 6.46E-02    |
| 9h                  | GO:0005096 | GTPase activator activity                                      | MF          | 5    | 0.678            | 6.58E-02    |
| 9h                  | GO:0015991 | ATP hydrolysis coupled proton transport                        | BP          | 10   | 0.512            | 6.98E-02    |
| 9h                  | GO:0016469 | proton-transporting two-sector ATPase complex                  | CC          | 10   | 0.512            | 7.00E-02    |
| 9h                  | GO:0015077 | monovalent inorganic cation transmembrane transporter activity | MF          | 12   | 0.429            | 7.07E-02    |
| 9h                  | GO:0034220 | ion transmembrane transport                                    | BP          | 12   | 0.429            | 7.24E-02    |

| Time post injection | GO ID      | GO Name                                                                                               | GO Category | Size | Enrichment score | FDR q value |
|---------------------|------------|-------------------------------------------------------------------------------------------------------|-------------|------|------------------|-------------|
| 9h                  | GO:1902600 | proton transmembrane transport                                                                        | BP          | 10   | 0.512            | 7.61E-02    |
| 9h                  | GO:0022890 | inorganic cation transmembrane transporter activity                                                   | MF          | 12   | 0.429            | 8.07E-02    |
| 9h                  | GO:0099131 | ATP hydrolysis coupled ion transmembrane transport                                                    | BP          | 10   | 0.512            | 8.43E-02    |
| 9h                  | GO:0042626 | ATPase activity, coupled to transmembrane movement of substances                                      | MF          | 4    | 0.851            | 9.23E-02    |
| 12h                 | GO:0019012 | virion                                                                                                | CC          | 30   | -0.742           | 0.00E+00    |
| 12h                 | GO:0019031 | viral envelope                                                                                        | CC          | 29   | -0.740           | 0.00E+00    |
| 12h                 | GO:0036338 | viral membrane                                                                                        | CC          | 29   | -0.740           | 0.00E+00    |
| 12h                 | GO:0044423 | virion part                                                                                           | CC          | 30   | -0.742           | 0.00E+00    |
| 24h                 | GO:0019012 | virion                                                                                                | CC          | 30   | -0.960           | 0.00E+00    |
| 24h                 | GO:0019031 | viral envelope                                                                                        | CC          | 29   | -0.960           | 0.00E+00    |
| 24h                 | GO:0044423 | virion part                                                                                           | CC          | 30   | -0.960           | 0.00E+00    |
| 24h                 | GO:0036338 | viral membrane                                                                                        | CC          | 29   | -0.960           | 0.00E+00    |
| 24h                 | GO:0005230 | extracellular ligand-gated ion channel activity                                                       | MF          | 18   | -0.456           | 4.01E-02    |
| 24h                 | GO:0005506 | iron ion binding                                                                                      | MF          | 47   | -0.287           | 4.50E-02    |
| 24h                 | GO:0016705 | oxidoreductase activity, acting on paired donors, with incorporation or reduction of molecular oxygen | MF          | 45   | -0.280           | 6.47E-02    |
| 24h                 | GO:0016646 | oxidoreductase activity, acting on the CH-NH group of donors, NAD or NADP as acceptor                 | MF          | 4    | -0.876           | 6.59E-02    |
| 36h                 | GO:0044423 | virion part                                                                                           | CC          | 30   | -0.973           | 0.00E+00    |
| 36h                 | GO:0019012 | virion                                                                                                | CC          | 30   | -0.973           | 0.00E+00    |
| 36h                 | GO:0036338 | viral membrane                                                                                        | CC          | 29   | -0.973           | 0.00E+00    |
| 36h                 | GO:0019031 | viral envelope                                                                                        | CC          | 29   | -0.973           | 0.00E+00    |
| 36h                 | GO:1901605 | alpha-amino acid metabolic process                                                                    | BP          | 29   | -0.368           | 2.50E-02    |
| 36h                 | GO:0044272 | sulfur compound biosynthetic process                                                                  | BP          | 10   | -0.591           | 4.39E-02    |

**Table S3. KEGG pathway representation.** Table of significantly (q value < 0.05) enriched KEGG pathways at 3, 6, 9, 12, 24 and 36 hours post white spot syndrome virus infection in *Penaeus vannamei* gills. *Drosophila melanogaster* homologs were retrieved for differentially expressed transcripts at each time points by BlastN search against the uniprot database and KEGG pathway annotations retrieved using the KEGG Automatic Annotation Server (KAAS) v2.1 (release 86.1, May 2018) against the *D. melanogaster* genes dataset with bidirectional best hits (Moriya et al., 2007). Enrichment analysis was performed using the Generally Applicable Gene-set Enrichment for Pathway Analysis (GAGE) v3.9 (Luo et al., 2009) package in R v3.3.2 (R Core Team, 2017). Overrepresented pathways are highlighted in green and underrepresented pathways are highlighted in red.

| Time post injection | KEGG ID  | KEGG Pathway                                | Over or under representation | p value  | q value  | Transcripts in pathway |
|---------------------|----------|---------------------------------------------|------------------------------|----------|----------|------------------------|
| 3h                  | dme03008 | Ribosome biogenesis in eukaryotes           | OVER                         | 4.23E-07 | 3.97E-05 | 53                     |
| 3h                  | dme00190 | Oxidative phosphorylation                   | UNDER                        | 8.83E-12 | 8.30E-10 | 83                     |
| 6h                  | dme03010 | Ribosome                                    | OVER                         | 3.26E-12 | 2.96E-10 | 113                    |
| 6h                  | dme00190 | Oxidative phosphorylation                   | OVER                         | 1.17E-06 | 5.31E-05 | 83                     |
| 6h                  | dme04145 | Phagosome                                   | OVER                         | 9.24E-04 | 2.80E-02 | 40                     |
| 6h                  | dme00970 | Aminoacyl-tRNA biosynthesis                 | OVER                         | 1.56E-03 | 3.56E-02 | 34                     |
| 6h                  | dme00520 | Amino sugar and nucleotide sugar metabolism | OVER                         | 4.42E-03 | 8.04E-02 | 31                     |
| 9h                  | dme00240 | Pyrimidine metabolism                       | OVER                         | 3.64E-04 | 2.15E-02 | 54                     |
| 9h                  | dme03008 | Ribosome biogenesis in eukaryotes           | OVER                         | 4.78E-04 | 2.15E-02 | 53                     |
| 9h                  | dme00190 | Oxidative phosphorylation                   | UNDER                        | 2.56E-29 | 2.30E-27 | 83                     |
| 9h                  | dme04145 | Phagosome                                   | UNDER                        | 4.78E-06 | 2.15E-04 | 38                     |
| 12h                 | dme03008 | Ribosome biogenesis in eukaryotes           | OVER                         | 1.62E-11 | 1.49E-09 | 53                     |
| 12h                 | dme03013 | RNA transport                               | OVER                         | 1.85E-05 | 8.52E-04 | 88                     |
| 12h                 | dme00240 | Pyrimidine metabolism                       | OVER                         | 1.76E-04 | 7.28E-04 | 52                     |
| 12h                 | dme04144 | Endocytosis                                 | OVER                         | 2.06E-04 | 4.73E-03 | 83                     |
| 12h                 | dme03020 | RNA polymerase                              | OVER                         | 1.05E-03 | 1.91E-02 | 19                     |
| 12h                 | dme00970 | Aminoacyl-tRNA biosynthesis                 | OVER                         | 1.25E-03 | 1.91E-02 | 34                     |
| 12h                 | dme03018 | RNA degradation                             | OVER                         | 2.48E-03 | 3.26E-02 | 40                     |
| 12h                 | dme00190 | Oxidative phosphorylation                   | UNDER                        | 3.30E-14 | 3.04E-12 | 83                     |
| 12h                 | dme03010 | Ribosome                                    | UNDER                        | 6.16E-07 | 2.83E-05 | 113                    |



| Time post injection | KEGG ID  | KEGG Pathway                                 | Over or under representation | p value  | q value  | Transcripts in pathway |
|---------------------|----------|----------------------------------------------|------------------------------|----------|----------|------------------------|
| 24h                 | dme03050 | Proteasome                                   | OVER                         | 2.37E-17 | 2.13E-15 | 32                     |
| 24h                 | dme04141 | Protein processing in endoplasmic reticulum  | OVER                         | 4.13E-13 | 1.86E-11 | 83                     |
| 24h                 | dme03008 | Ribosome biogenesis in eukaryotes            | OVER                         | 1.98E-05 | 5.93E-04 | 53                     |
| 24h                 | dme04215 | Apoptosis - multiple species                 | OVER                         | 8.52E-04 | 1.92E-02 | 11                     |
| 24h                 | dme03013 | RNA transport                                | OVER                         | 1.18E-03 | 2.13E-02 | 87                     |
| 24h                 | dme03020 | RNA polymerase                               | OVER                         | 1.96E-03 | 2.68E-02 | 19                     |
| 24h                 | dme00190 | Oxidative phosphorylation                    | OVER                         | 2.13E-03 | 2.68E-02 | 83                     |
| 24h                 | dme03060 | Protein export                               | OVER                         | 2.38E-03 | 2.68E-02 | 15                     |
| 24h                 | dme03010 | Ribosome                                     | OVER                         | 3.06E-03 | 3.06E-02 | 113                    |
| 24h                 | dme03040 | Spliceosome                                  | OVER                         | 4.45E-03 | 4.00E-02 | 98                     |
| 24h                 | dme00240 | Pyrimidine metabolism                        | OVER                         | 5.37E-03 | 4.39E-02 | 52                     |
| 24h                 | dme03030 | DNA replication                              | UNDER                        | 3.39E-10 | 2.80E-08 | 30                     |
| 24h                 | dme04146 | Peroxisome                                   | UNDER                        | 6.22E-10 | 2.80E-08 | 50                     |
| 24h                 | dme00071 | Fatty acid degradation                       | UNDER                        | 6.85E-07 | 2.06E-05 | 21                     |
| 24h                 | dme00280 | Valine, leucine and isoleucine degradation   | UNDER                        | 1.34E-05 | 2.58E-04 | 30                     |
| 24h                 | dme00980 | Metabolism of xenobiotics by cytochrome P450 | UNDER                        | 1.71E-05 | 2.58E-04 | 10                     |
| 24h                 | dme00380 | Tryptophan metabolism                        | UNDER                        | 1.72E-05 | 2.58E-04 | 13                     |
| 24h                 | dme00410 | beta-Alanine metabolism                      | UNDER                        | 3.09E-05 | 3.97E-04 | 11                     |
| 24h                 | dme00040 | Pentose and glucuronate interconversions     | UNDER                        | 4.12E-05 | 3.97E-04 | 16                     |
| 24h                 | dme01212 | Fatty acid metabolism                        | UNDER                        | 6.24E-05 | 5.89E-04 | 27                     |
| 24h                 | dme00640 | Propanoate metabolism                        | UNDER                        | 6.54E-05 | 5.89E-04 | 17                     |
| 24h                 | dme00982 | Drug metabolism - cytochrome P450            | UNDER                        | 1.00E-04 | 8.20E-04 | 10                     |
| 24h                 | dme00500 | Starch and sucrose metabolism                | UNDER                        | 1.54E-04 | 1.16E-03 | 12                     |
| 24h                 | dme00310 | Lysine degradation                           | UNDER                        | 6.21E-04 | 4.30E-03 | 29                     |
| 24h                 | dme00630 | Glyoxylate and dicarboxylate metabolism      | UNDER                        | 8.60E-04 | 5.53E-03 | 23                     |
| 24h                 | dme00350 | Tyrosine metabolism                          | UNDER                        | 1.26E-03 | 7.57E-03 | 10                     |
| 24h                 | dme04391 | Hippo signaling pathway - fly                | UNDER                        | 1.69E-03 | 9.53E-03 | 41                     |
| 24h                 | dme04068 | FoxO signaling pathway                       | UNDER                        | 2.12E-03 | 1.12E-02 | 38                     |
| 24h                 | dme03410 | Base excision repair                         | UNDER                        | 4.31E-03 | 2.15E-02 | 15                     |
| 24h                 | dme04392 | Hippo signaling pathway -multiple species    | UNDER                        | 5.50E-03 | 2.61E-02 | 13                     |
| 24h                 | dme00620 | Pyruvate metabolism                          | UNDER                        | 6.02E-03 | 2.70E-02 | 21                     |

| Time post injection | KEGG ID  | KEGG Pathway                                 | Over or under representation | p value  | q value  | Transcripts in pathway |
|---------------------|----------|----------------------------------------------|------------------------------|----------|----------|------------------------|
| 24h                 | dme00511 | Other glycan degradation                     | UNDER                        | 6.30E-03 | 2.70E-02 | 12                     |
| 24h                 | dme00010 | Glycolysis / Gluconeogenesis                 | UNDER                        | 7.00E-03 | 2.86E-02 | 26                     |
| 24h                 | dme00250 | Alanine, aspartate and glutamate metabolism  | UNDER                        | 7.45E-03 | 2.91E-02 | 12                     |
| 24h                 | dme00062 | Fatty acid elongation                        | UNDER                        | 9.34E-03 | 3.50E-02 | 13                     |
| 24h                 | dme04142 | Lysosome                                     | UNDER                        | 1.54E-02 | 5.21E-02 | 56                     |
| 24h                 | dme00260 | Glycine, serine and threonine metabolism     | UNDER                        | 1.57E-02 | 5.21E-02 | 22                     |
| 24h                 | dme03440 | Homologous recombination                     | UNDER                        | 1.62E-02 | 5.21E-02 | 16                     |
| 24h                 | dme00531 | Glycosaminoglycan degradation                | UNDER                        | 1.67E-02 | 5.21E-02 | 12                     |
| 24h                 | dme04150 | mTOR signaling pathway                       | UNDER                        | 1.68E-02 | 5.21E-02 | 55                     |
| 24h                 | dme00514 | Other types of O-glycan biosynthesis         | UNDER                        | 1.88E-02 | 5.63E-02 | 10                     |
| 24h                 | dme03430 | Mismatch repair                              | UNDER                        | 2.82E-02 | 8.18E-02 | 16                     |
| 24h                 | dme04070 | Phosphatidylinositol signaling system        | UNDER                        | 3.52E-02 | 9.89E-02 | 27                     |
| 36h                 | dme03008 | Ribosome biogenesis in eukaryotes            | OVER                         | 5.50E-15 | 5.01E-13 | 53                     |
| 36h                 | dme03010 | Ribosome                                     | OVER                         | 1.16E-11 | 5.29E-10 | 113                    |
| 36h                 | dme03050 | Proteasome                                   | OVER                         | 1.04E-05 | 2.73E-04 | 32                     |
| 36h                 | dme03040 | Spliceosome                                  | OVER                         | 1.20E-05 | 2.73E-04 | 98                     |
| 36h                 | dme03013 | RNA transport                                | OVER                         | 2.14E-05 | 3.89E-04 | 88                     |
| 36h                 | dme03020 | RNA polymerase                               | OVER                         | 8.55E-05 | 1.30E-03 | 19                     |
| 36h                 | dme04141 | Protein processing in endoplasmic reticulum  | OVER                         | 2.99E-03 | 3.88E-02 | 83                     |
| 36h                 | dme00240 | Pyrimidine metabolism                        | OVER                         | 4.52E-03 | 5.14E-02 | 54                     |
| 36h                 | dme03030 | DNA replication                              | UNDER                        | 2.20E-10 | 2.01E-08 | 30                     |
| 36h                 | dme04146 | Peroxisome                                   | UNDER                        | 9.20E-08 | 4.18E-06 | 50                     |
| 36h                 | dme00280 | Valine, leucine and isoleucine degradation   | UNDER                        | 2.66E-06 | 8.06E-05 | 30                     |
| 36h                 | dme04068 | FoxO signaling pathway                       | UNDER                        | 5.15E-06 | 1.17E-04 | 38                     |
| 36h                 | dme00980 | Metabolism of xenobiotics by cytochrome P450 | UNDER                        | 2.45E-05 | 3.85E-04 | 10                     |
| 36h                 | dme00380 | Tryptophan metabolism                        | UNDER                        | 2.54E-05 | 3.85E-04 | 13                     |
| 36h                 | dme00410 | beta-Alanine metabolism                      | UNDER                        | 3.20E-05 | 4.16E-04 | 12                     |
| 36h                 | dme00982 | Drug metabolism - cytochrome P450            | UNDER                        | 8.23E-05 | 8.97E-04 | 10                     |
| 36h                 | dme00071 | Fatty acid degradation                       | UNDER                        | 8.87E-05 | 8.97E-04 | 21                     |
| 36h                 | dme00640 | Propanoate metabolism                        | UNDER                        | 2.02E-04 | 1.84E-03 | 17                     |
| 36h                 | dme00310 | Lysine degradation                           | UNDER                        | 4.34E-04 | 3.59E-03 | 27                     |

| Time post injection | KEGG ID  | KEGG Pathway                                | Over or under representation | p value  | q value  | Transcripts in pathway |
|---------------------|----------|---------------------------------------------|------------------------------|----------|----------|------------------------|
| 36h                 | dme00040 | Pentose and glucuronate interconversions    | UNDER                        | 6.45E-04 | 4.89E-03 | 16                     |
| 36h                 | dme01212 | Fatty acid metabolism                       | UNDER                        | 1.00E-03 | 7.03E-03 | 27                     |
| 36h                 | dme03430 | Mismatch repair                             | UNDER                        | 1.30E-03 | 8.44E-03 | 16                     |
| 36h                 | dme03440 | Homologous recombination                    | UNDER                        | 2.21E-03 | 1.34E-02 | 18                     |
| 36h                 | dme03410 | Base excision repair                        | UNDER                        | 4.51E-03 | 2.57E-02 | 15                     |
| 36h                 | dme00062 | Fatty acid elongation                       | UNDER                        | 4.86E-03 | 2.60E-02 | 14                     |
| 36h                 | dme00630 | Glyoxylate and dicarboxylate metabolism     | UNDER                        | 5.78E-03 | 2.92E-02 | 23                     |
| 36h                 | dme00620 | Pyruvate metabolism                         | UNDER                        | 7.05E-03 | 3.38E-02 | 21                     |
| 36h                 | dme04150 | mTOR signaling pathway                      | UNDER                        | 7.89E-03 | 3.59E-02 | 55                     |
| 36h                 | dme00250 | Alanine, aspartate and glutamate metabolism | UNDER                        | 1.08E-02 | 4.67E-02 | 14                     |
| 36h                 | dme04142 | Lysosome                                    | UNDER                        | 1.38E-02 | 5.71E-02 | 56                     |
| 36h                 | dme00010 | Glycolysis / Gluconeogenesis                | UNDER                        | 2.31E-02 | 9.12E-02 | 26                     |
